# Supplementary material for: Morphological evolution of individual microrods to self-assembled 3D hierarchical flower architectures of CuBixIn1−xSe2 for photo response applications
Source: Royal Society of Chemistry journal article supplement (doi:10.1039/d3tc03250g), 2024-01-01
Supplement: d3tc03250g1.pdf [file d3tc03250g1.pdf]

## Supporting information

# Morphological evolution of individual microrods to self-assembled 3D hierarchical flower architectures of $\text{CuBi}_x\text{In}_{1-x}\text{Se}_2$ for photo response application

Priyanka Priyadarshini<sup>1</sup>, Subrata Senapati<sup>1\*</sup>, Ashutosh Mohapatra<sup>1</sup>, Monalisa Pradhan<sup>2</sup>, Devarajan Alagarasan<sup>3</sup>, Ramakanta Naik<sup>1\*</sup>

<sup>1</sup>Institute of Chemical Technology, Indian Oil Odisha Campus, Bhubaneswar, 751013, India.

<sup>2</sup>Department of Physics, School of Applied Science, KIIT Deemed to be University, Bhubaneswar, 751024, India

<sup>3</sup> Department of Physics, Nitte Meenakshi Institute of Technology, Yelahanka, Bengaluru, 560064, India

\*Corresponding Authors.

Email addresses: [ramakanta.naik@gmail.com](mailto:ramakanta.naik@gmail.com) (Ramakanta Naik)

[subrata.uu@gmail.com](mailto:subrata.uu@gmail.com) (Subrata Senapati)

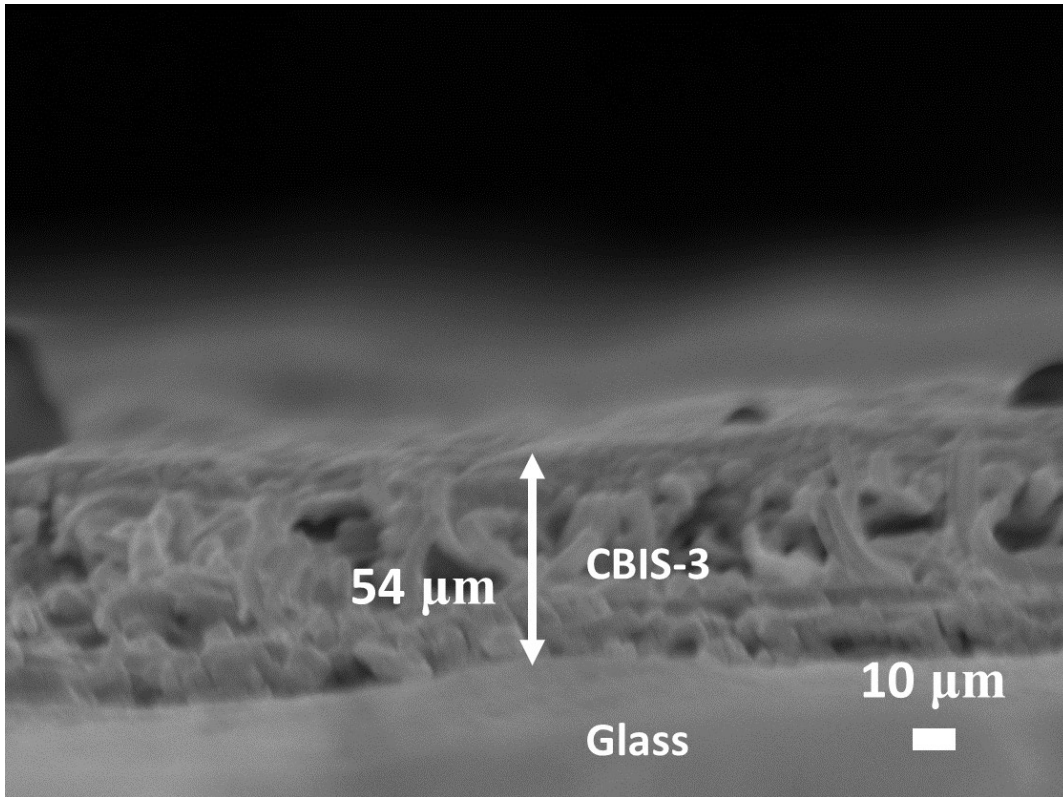

**Fig. S1.** Cross-sectional SEM image of CBIS-3 sample film for current-voltage measurement.

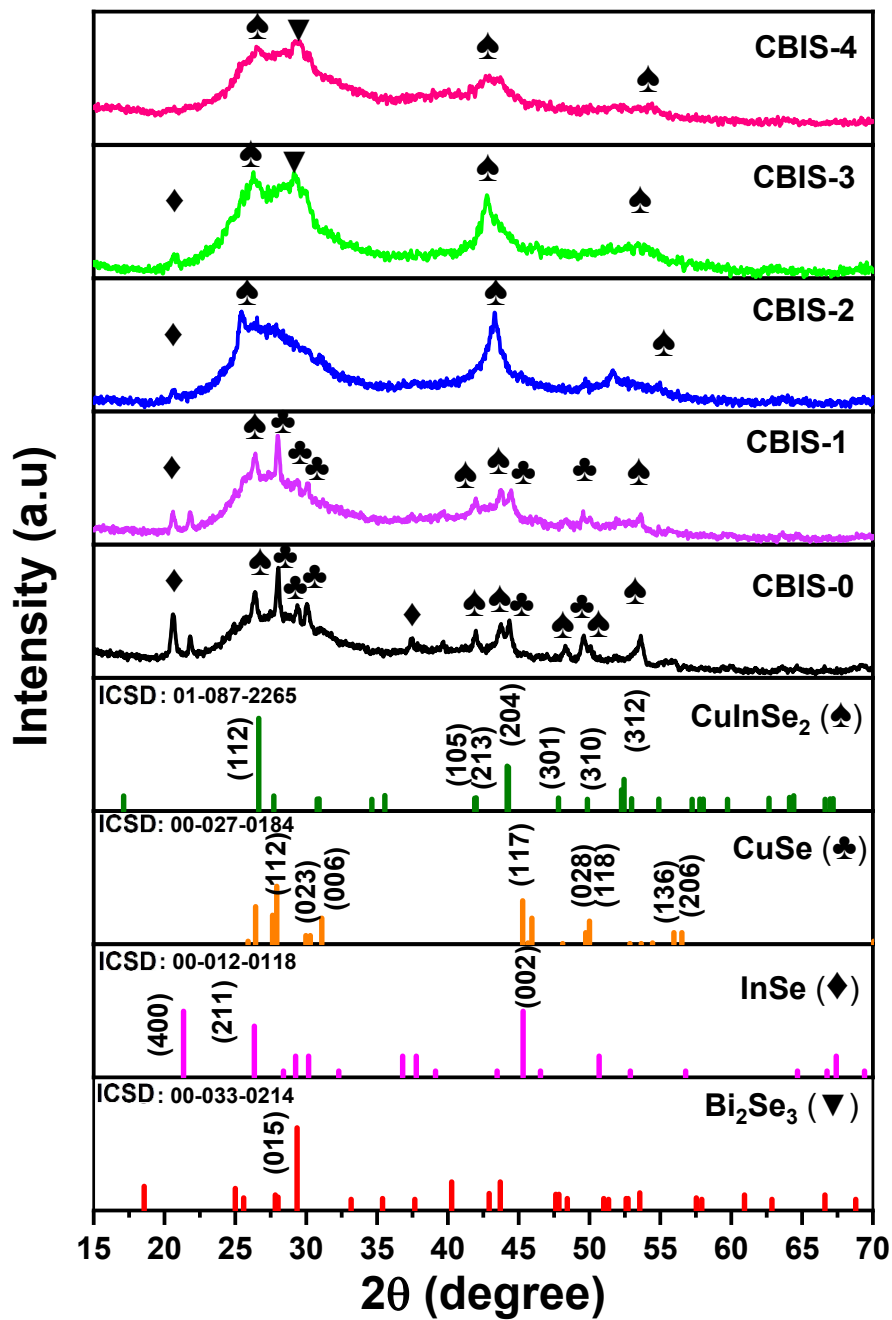

Fig. S2. XRD pattern of all CBIS MFs.

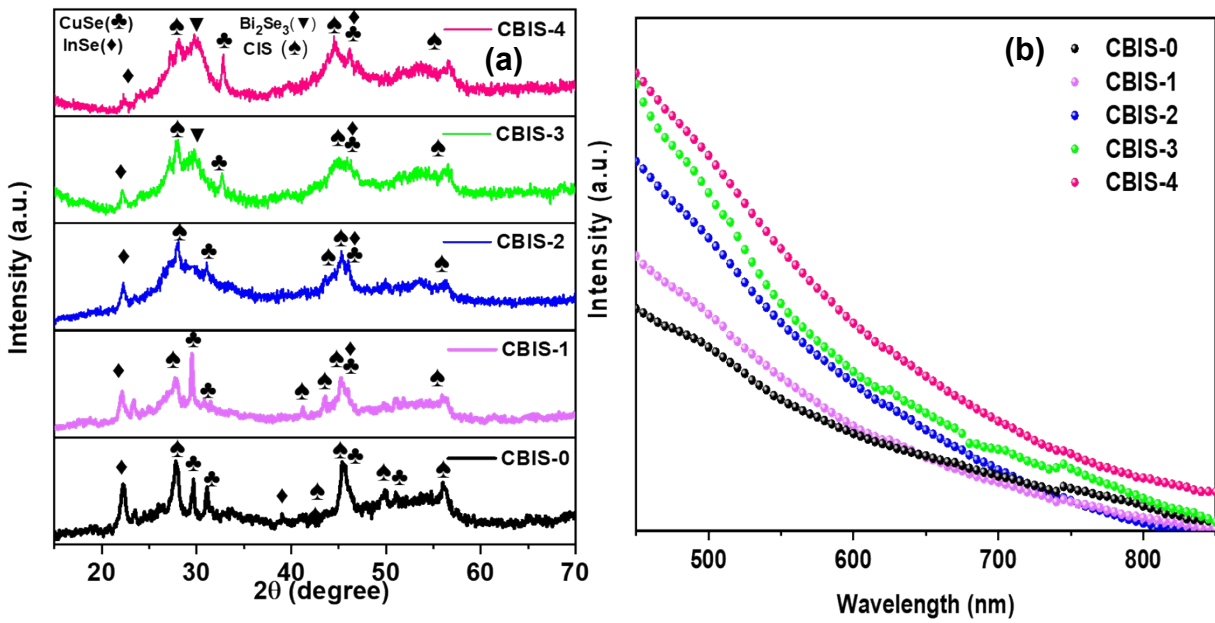

Fig. S3. (a) XRD pattern, (b) absorption spectra of reproduced samples.

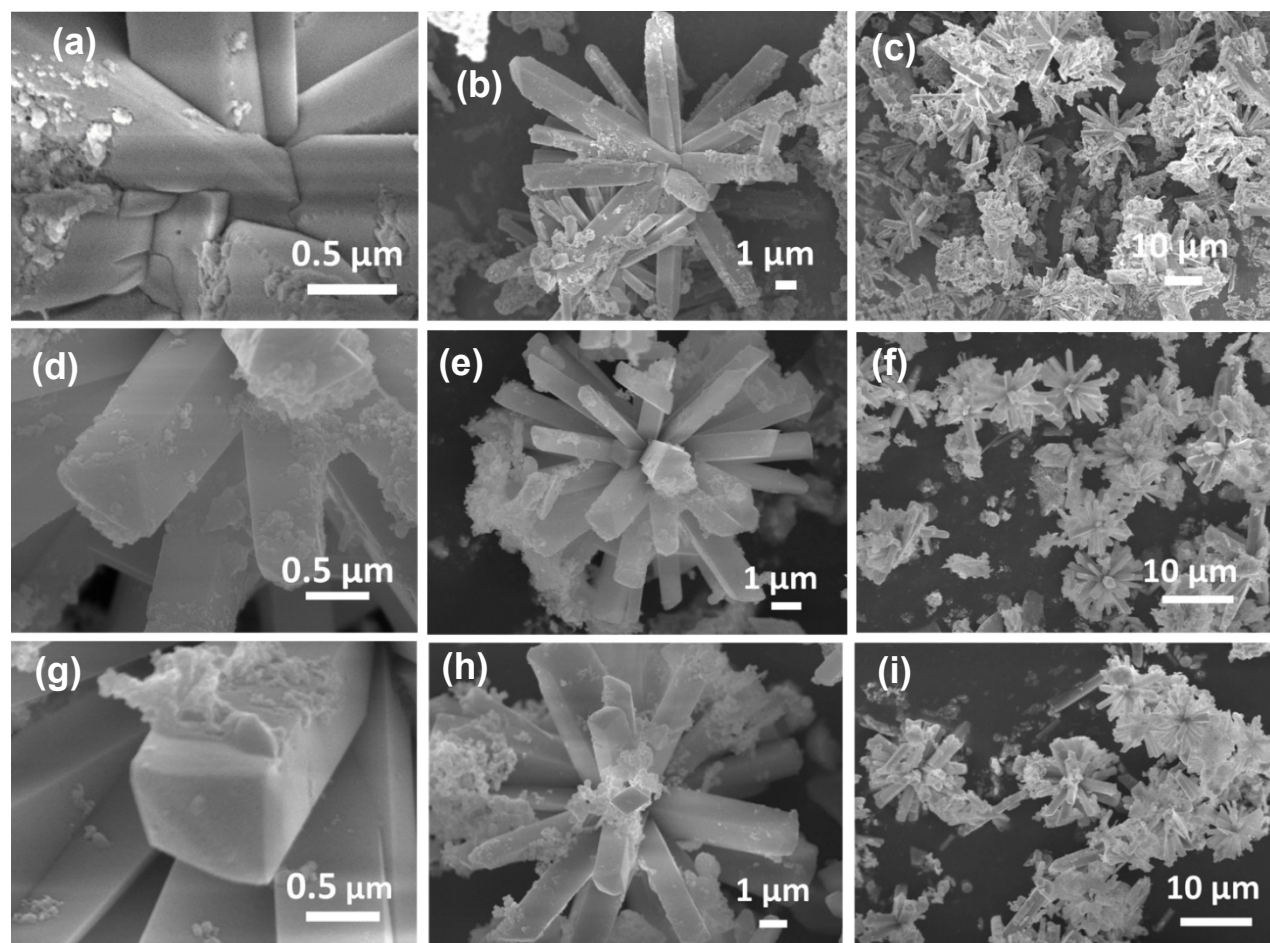

**Fig. S4.** FESEM images of (a, b, c) CBIS-1, (d, e, f) CBIS-3, and (g, h, i) CBIS-4 for three different magnifications.

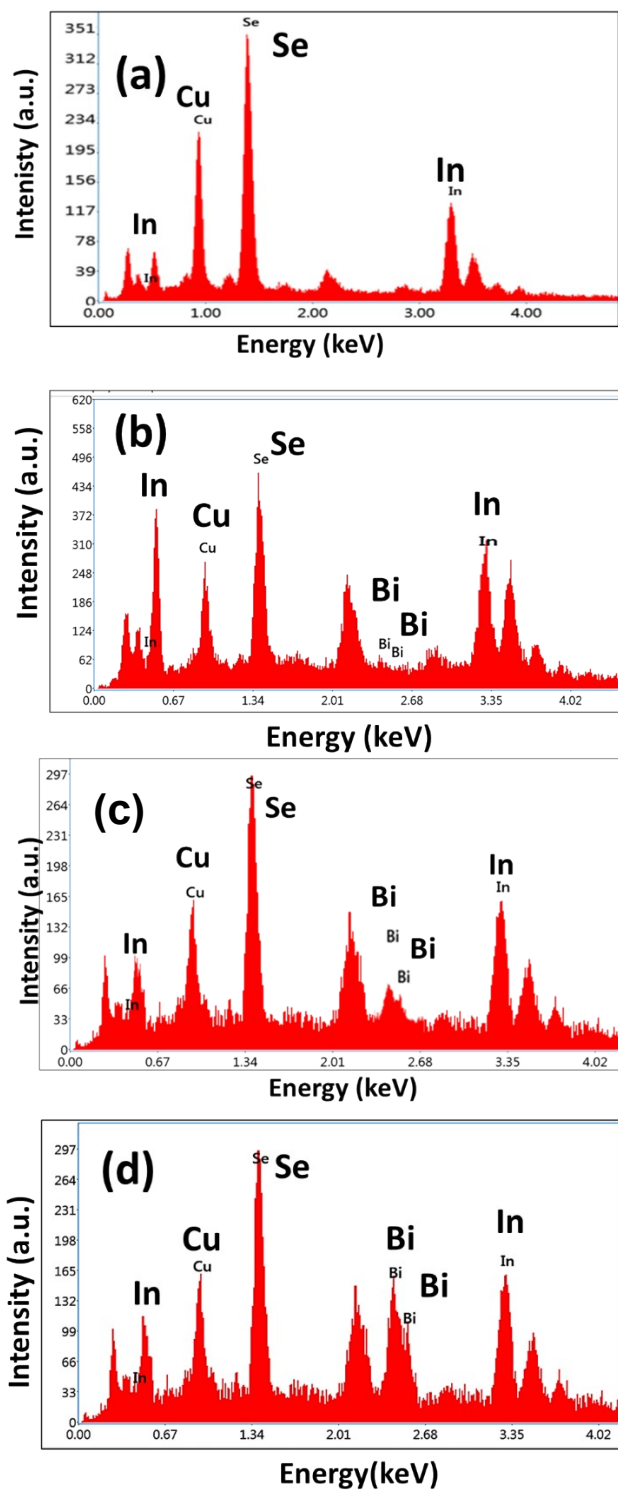

**Fig. S5.** EDX spectra of (a) CBIS-0, (b) CBIS-1, (c) CBIS-3, and (d) CBIS-4 samples.

**Table S1.** Elemental composition variation comparison of different CBIS MFs.

| <b>Sample</b>   | <b>CBIS-0</b> |            |               | <b>CBIS-1</b> |            |               | <b>CBIS-2</b> |            |               | <b>CBIS-3</b> |            |               | <b>CBIS-4</b> |            |               |
|-----------------|---------------|------------|---------------|---------------|------------|---------------|---------------|------------|---------------|---------------|------------|---------------|---------------|------------|---------------|
| <b>Elements</b> | <b>EDX</b>    | <b>XPS</b> | <b>ICP-MS</b> |
| <b>Cu</b>       | 24.12         | 23.41      | -             | 25.13         | -          | -             | 24.51         | -          | -             | 24.97         | -          | -             | 25.76         | 25.12      | 25.55         |
| <b>Se</b>       | 50.27         | 51.65      | -             | 49.87         | -          | -             | 50.54         | -          | -             | 49.98         | -          | -             | 48.91         | 49.46      | 47.77         |
| <b>In</b>       | 25.61         | 24.94      | -             | 19.76         | -          | -             | 15.07         | -          | -             | 9.89          | -          | -             | 5.66          | 4.96       | 4.99          |
| <b>Bi</b>       | 0             | 0          | -             | 5.33          | -          | -             | 9.88          | -          | -             | 15.16         | -          | -             | 19.67         | 20.54      | 21.81         |
| <b>Total</b>    | 100           | 100        | -             | 100           | -          | -             | 100           | -          | -             | 100           | -          | -             | 100           | 100        | 100           |

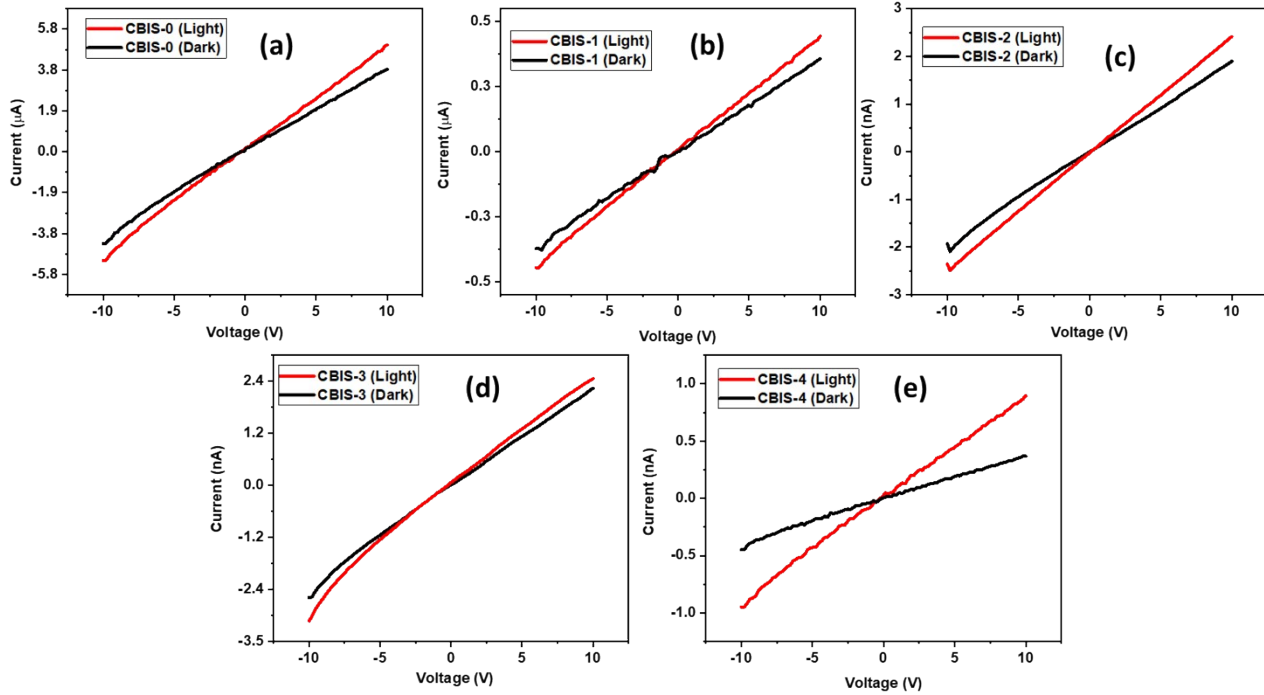

**Fig. S6.** Current-voltage variation graph of reproduced samples.



**Table S2.**  $I_{on}$  and  $I_{off}$  and response time values for CBIS-0, CBIS-2, and CBIS-4 samples.

| <b>Sample</b> | <b><math>I_{on}</math></b> | <b><math>I_{off}</math> (Rise time)</b> | <b><math>I_{off}</math> (Fall time)</b> | <b><math>\tau_r</math>(sec)</b> | <b><math>\tau_f</math>(sec)</b> |
|---------------|----------------------------|-----------------------------------------|-----------------------------------------|---------------------------------|---------------------------------|
| CBIS-0        | 5.77 $\mu$ A               | 5.03 $\mu$ A                            | 5.18 $\mu$ A                            | 55                              | 58                              |
| CBIS-2        | 1.57 nA                    | 0.51 nA                                 | 0.59 nA                                 | 47                              | 63                              |
| CBIS-4        | 0.99 nA                    | 0.90 nA                                 | 0.92 nA                                 | 45                              | 65                              |

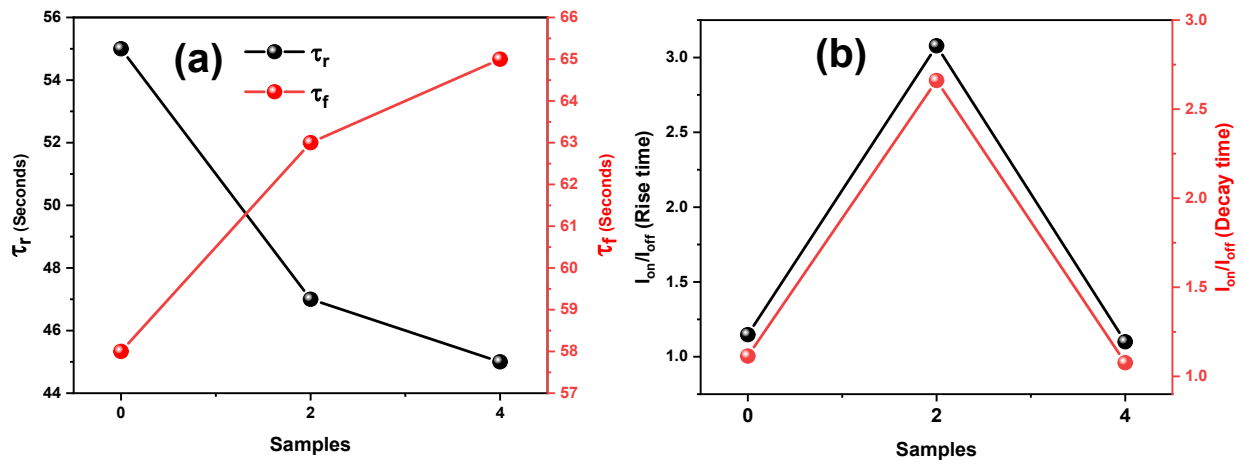

**Fig. S7.** (a) Rise and fall time variation and (b)  $I_{on}/I_{off}$  and (c)  $I_{on}/I_{off}$  ratio of studied samples.

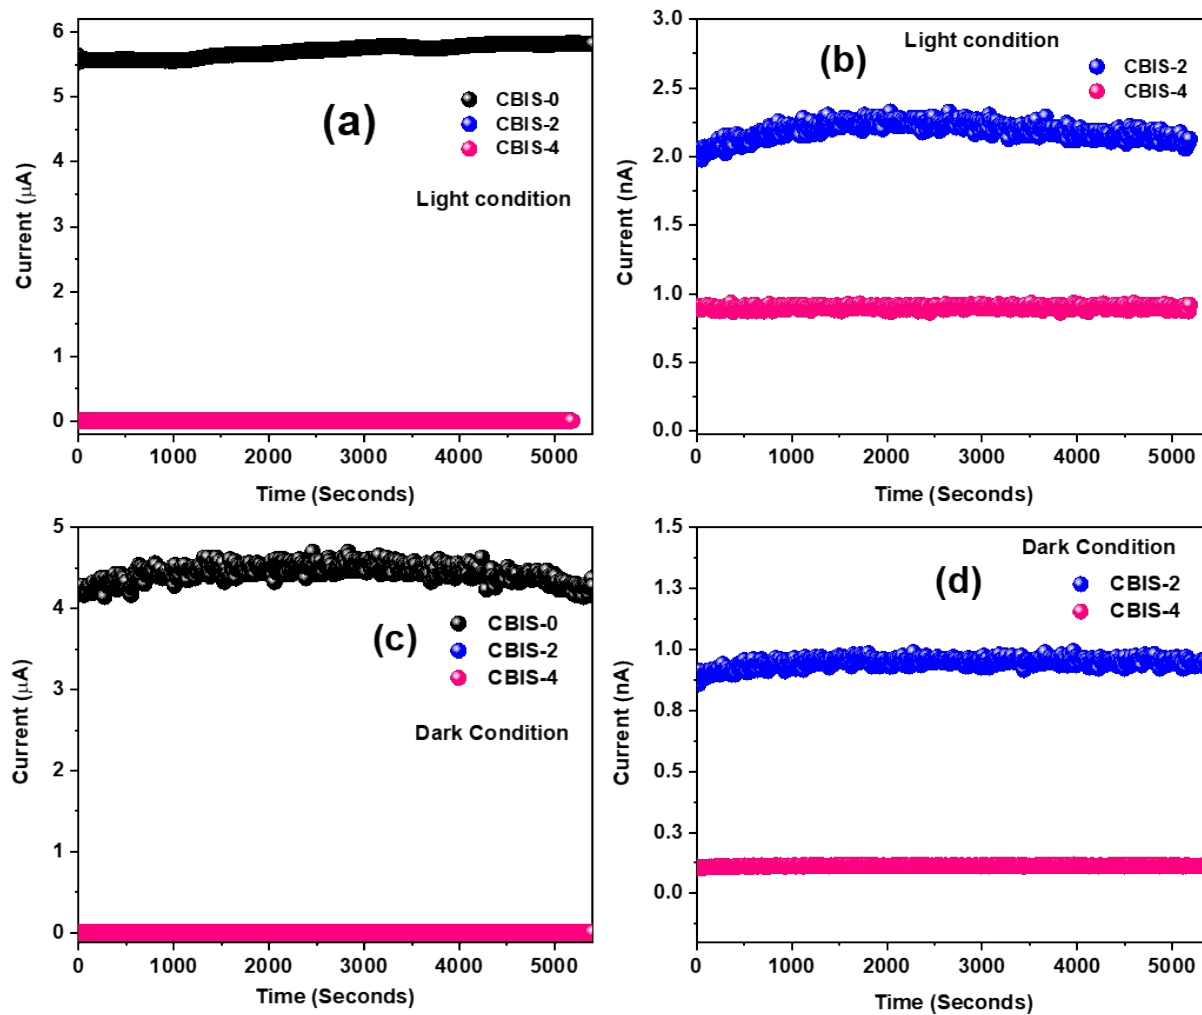

**Fig. S8.** Photocurrent stability under (a,b) light and (c,d) dark conditions of CBIS-0, CBIS-2, and CBIS-4 samples.

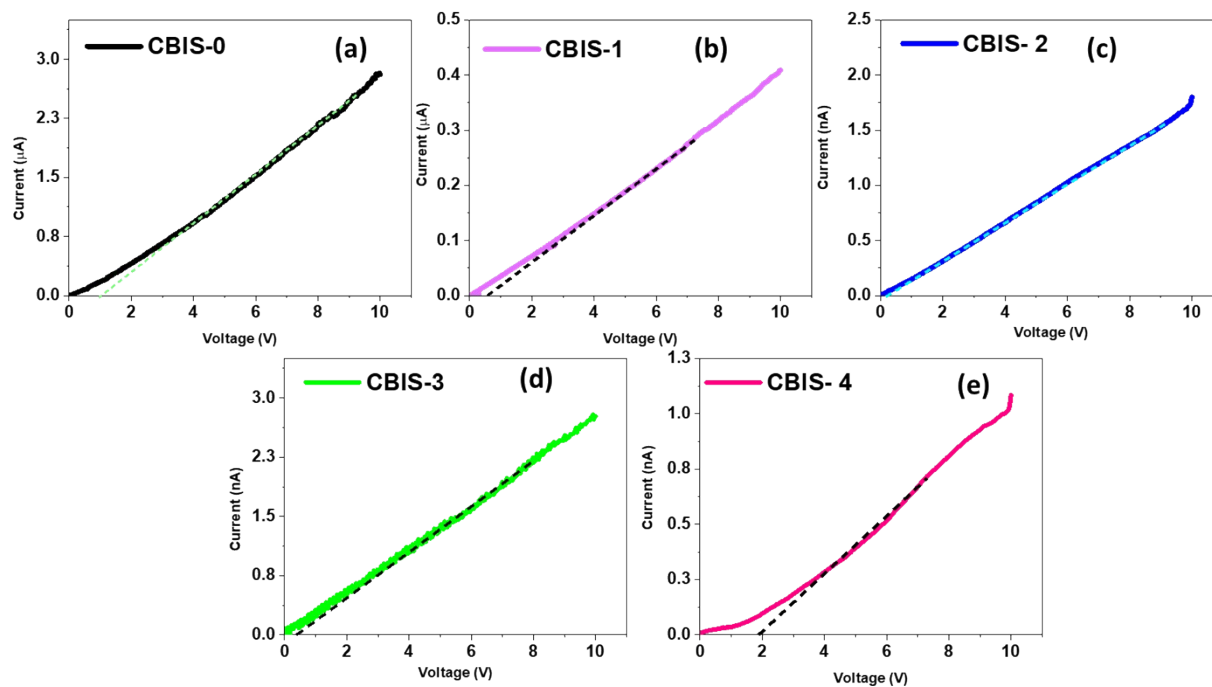

**Fig. S9.** Evaluation of resistance of all CBIS samples in the presence of light.
